# Supplementary material for: Changes in Energy Sector Strategies: A Literature Review
Source: MDPI journal article supplement (doi:10.3390/en15197068), 2022-09-26
Supplement: s1 [file s1]

# Supplementary Materials File S1

Sulich <sup>1,2,\*</sup> and Letycja Sołoducho-Pelc <sup>3,\*</sup>

<sup>1</sup> Schulich School of Business, York University, 4700 Keele Str., Toronto, ON M3J 1P3, Canada

<sup>2</sup> Department of Advanced Research in Management, Faculty of Business Management, Wrocław University of Economics and Business; Komandorska Str. 118/120, 53-345 Wrocław, Poland

<sup>3</sup> Strategic Management Department, Faculty of Business Management, Wrocław University of Economics and Business; Komandorska Str. 118/120, 53-345 Wrocław, Poland

\* Correspondence: adam.sulich@ue.wroc.pl (A.S.) and letycja.soloducho-pelc@ue.wroc.pl (L.S.-P.)

**Citation:** Sulich, A.; Sołoducho-Pelc, L. Changes in Energy Sector Strategies: A Literature Review. *Energies* **2022**, *15*, 7068. <https://doi.org/10.3390/en15197068>

Academic Editor: Juri Belikov

Received: 7 September 2022

Accepted: 22 September 2022

Published: 26 September 2022

**Publisher's Note:** MDPI stays neutral with regard to jurisdictional claims in published maps and institutional affiliations.

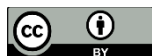

**Copyright:** © 2022 by the authors. Submitted for possible open access publication under the terms and conditions of the Creative Commons Attribution (CC BY) license (<https://creativecommons.org/licenses/by/4.0/>).

This supplementary material contains the results of original Queries presented in Table 1 in the paper titled *Energy Sector Transformation Strategies: Literature Review*. The syntax of Query 1 is: (TITLE-ABS-KEY ("energy sector")) AND (transition AND strategies) and this query yielded with gave 2290 results. Following the methodology of a Systematic Literature Review (SLR), a subsequent citation analysis assessed the impact of individual publications on further research and scientific considerations. In Table S1 there are 10 most cited publications among results from Query 1.

**Table S1.** The 10 most cited publications result from Scopus Query no 1.

| No. | Document title                                                                                                                        | Authors                                                                     | Year | Source                                                                  | Citations<br>(20 Aug 2022) |
|-----|---------------------------------------------------------------------------------------------------------------------------------------|-----------------------------------------------------------------------------|------|-------------------------------------------------------------------------|----------------------------|
| 1   | A review of computer tools for analysing the integration of renewable energy into various energy systems (journal article)            | Connolly, D., Lund, H., Mathiesen, B.V., Leahy, M.                          | 2010 | Applied Energy, 87(4), pp. 1059-1082                                    | 1127                       |
| 2   | Blockchain technology in the energy sector: A systematic review of challenges and opportunities                                       | Andoni, M., Robu, V., Flynn, D., (...), McCallum, P., Peacock, A.           | 2019 | Renewable and Sustainable Energy Reviews, 100, pp. 143-174              | 844                        |
| 3   | Catalytic reduction of CO <sub>2</sub> by H <sub>2</sub> for synthesis of CO, methanol and hydrocarbons: Challenges and opportunities | Porosoff, M.D., Yan, B., Chen, J.G.                                         | 2016 | Energy and Environmental Science, 9(1), pp. 62-73                       | 677                        |
| 4   | Climate benefits of changing diet                                                                                                     | Stehfest, E., Bouwman, L., Van Vuuren, D.P., (...), Eickhout, B., Kabat, P. | 2009 | Climatic Change, 95(1-2), pp. 83-102                                    | 558                        |
| 5   | Nanoparticles and the environment                                                                                                     | Biswas, P.                                                                  | 2005 | Journal of the Air and Waste Management Association, 55(6), pp. 708-746 | 482                        |
| 6   | Design, demonstrations and sustainability impact assessments for plug-in hybrid electric vehicles                                     | Bradley, T.H., Frank, A.A.                                                  | 2009 | Renewable and Sustainable Energy Reviews, 13(1), pp. 115-128            | 377                        |
| 7   | Carbon-Nanotube-Based Thermoelectric Materials and Devices                                                                            | Blackburn, J.L., Ferguson, A.J., Cho, C., Grunlan, J.C.                     | 2018 | Advanced Materials, 30(11), 1704386                                     | 359                        |
| 8   | Greening Ammonia toward the Solar Ammonia Refinery                                                                                    | Wang, L., Xia, M., Wang, H., (...), Maravelias, C.T., Ozin, G.A.            | 2018 | Joule, 2(6), pp. 1055-1074                                              | 346                        |
| 9   | Grassroots innovations in community energy: The role of intermediaries in niche development                                           | Hargreaves, T., Hielscher, S., Seyfang, G., Smith, A.                       | 2013 | Global Environmental Change, 23(5), pp. 868-880                         | 327                        |

|    |                                                                      |                                                                                         |      |                                                           |     |
|----|----------------------------------------------------------------------|-----------------------------------------------------------------------------------------|------|-----------------------------------------------------------|-----|
| 10 | Energy storage in the energy transition context: A technology review | Gallo, A.B., Simões-Moreira, J.R., Costa, H.K.M., Santos, M.M., Moutinho dos Santos, E. | 2016 | Renewable and Sustainable Energy Reviews, 65, pp. 800-822 | 324 |
|----|----------------------------------------------------------------------|-----------------------------------------------------------------------------------------|------|-----------------------------------------------------------|-----|

Source: Authors' elaboration based on the Query 1 results.

The syntax of Query 2 is: ((TITLE-ABS-KEY ("energy sector")) AND (transformation AND strategies)) and this query yielded with gave 1400 results. In Table S2 there are 10 most cited publications among results from Query 2.

**Table S2.** The 10 most cited publications result from Scopus Query no 2.

| No. | Document title                                                                                    | Authors                                                                                 | Year | Source                                                                  | Citations<br>(20 Aug 2022) |
|-----|---------------------------------------------------------------------------------------------------|-----------------------------------------------------------------------------------------|------|-------------------------------------------------------------------------|----------------------------|
| 1   | The contribution of biomass in the future global energy supply: A review of 17 studies            | Berndes, G., Hoogwijk, M., Van Den Broek, R.                                            | 2003 | Biomass and Bioenergy 25(1), pp. 1-28                                   | 858                        |
| 2   | Nanoparticles and the environment                                                                 | Biswas, P.                                                                              | 2005 | Journal of the Air and Waste Management Association, 55(6), pp. 708-746 | 482                        |
| 3   | Tilting at windmills? The environmental movement and the emergence of the U.S. wind energy sector | Sine, W.D., Lee, B.H.                                                                   | 2009 | Administrative Science Quarterly 54(1), pp. 123-155                     | 346                        |
| 4   | Energy storage in the energy transition context: A technology review                              | Gallo, A.B., Simões-Moreira, J.R., Costa, H.K.M., Santos, M.M., Moutinho dos Santos, E. | 2016 | Renewable and Sustainable Energy Reviews, 65, pp. 800-822               | 324                        |

---

|    |                                                                                                                |                                                                         |      |                                                                  |     |
|----|----------------------------------------------------------------------------------------------------------------|-------------------------------------------------------------------------|------|------------------------------------------------------------------|-----|
| 5  | Energy poverty: An overview                                                                                    | González-Eguino, M.                                                     | 2015 | Renewable and Sustainable Energy Reviews, 47, 4168, pp. 377-385  | 282 |
| 6  | The impact of social norms on entrepreneurial action: Evidence from the environmental entrepreneurship context | Meek, W.R., Pacheco, D.F., York, J.G.                                   | 2010 | Journal of Business Venturing, 25(5), pp. 493-509                | 271 |
| 7  | A grassroots sustainable energy niche? Reflections on community energy in the UK                               | Seyfang, G., Hielscher, S., Hargreaves, T., Martiskainen, M., Smith, A. | 2014 | Environmental Innovation and Societal Transitions, 13, pp. 21-44 | 243 |
| 8  | Photocatalytic production of hydrogen from biomass-derived feedstocks                                          | Puga, A.V.                                                              | 2016 | Coordination Chemistry Reviews 315, pp. 1-66                     | 239 |
| 9  | Implementing transition management as policy reforms: A case study of the Dutch energy sector                  | Kern, F., Howlett, M.                                                   | 2009 | Communication Patterns of Engineers, pp. 1-263                   | 228 |
| 10 | Rural energy in developing countries: A challenge for economic development                                     | Barnes, D.F., Floor, W.M.                                               | 1996 | Annual Review of Energy and the Environment, 21(1), pp. 497-530  | 208 |

---

Source: Authors' elaboration based on the Query 2 results.

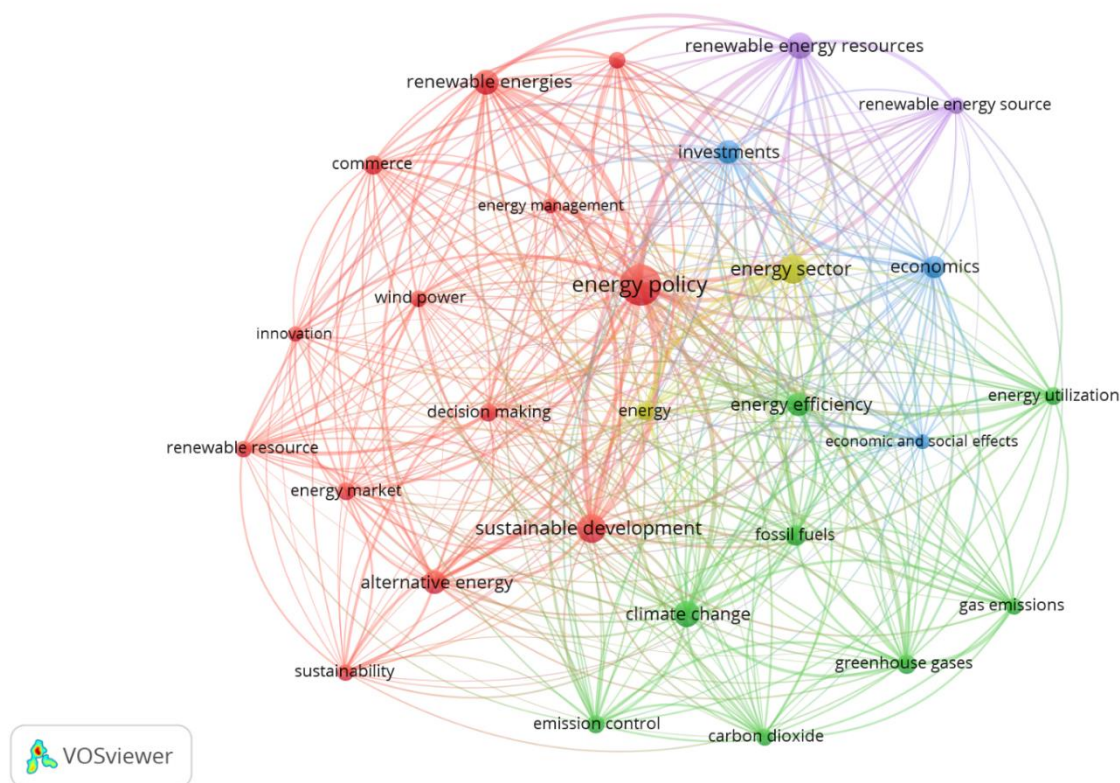

**Figure S1.** Bibliometric map of indexed keywords co-occurrence results from Scopus based on Query 2. Source: Authors' elaboration performed in VOSviewer (version 1.6.18).

The syntax of Query 3 is: (TITLE-ABS-KEY ("energy sector")) AND (transition AND transformation AND strategy) and this query yielded with gave 830 results. In Table S3 there are 10 most cited publications among results from Query 3.

**Table S3.** The 10 most cited publications result from Scopus Query no 3.

| No. | Document title                                                                                                 | Authors                                                                                 | Year | Source                                                                                                  | Citations<br>(20 Aug 2022) |
|-----|----------------------------------------------------------------------------------------------------------------|-----------------------------------------------------------------------------------------|------|---------------------------------------------------------------------------------------------------------|----------------------------|
| 1   | Nanoparticles and the environment                                                                              | Biswas, P.                                                                              | 2005 | Journal of the Air and Waste Management Association, 55(6), pp. 708-746                                 | 482                        |
| 2   | Energy storage in the energy transition context: A technology review                                           | Gallo, A.B., Simões-Moreira, J.R., Costa, H.K.M., Santos, M.M., Moutinho dos Santos, E. | 2016 | Renewable and Sustainable Energy Reviews, 65, pp. 800-822                                               | 324                        |
| 3   | The impact of social norms on entrepreneurial action: Evidence from the environmental entrepreneurship context | Meek, W.R., Pacheco, D.F., York, J.G.                                                   | 2010 | Journal of Business Venturing 25(5), pp. 493-509                                                        | 271                        |
| 4   | A grassroots sustainable energy niche? Reflections on community energy in the UK                               | Seyfang, G., Hielscher, S., Hargreaves, T., Martiskainen, M., Smith, A.                 | 2014 | Environmental Innovation and Societal Transitions, 13, pp. 21-44                                        | 243                        |
| 5   | Implementing transition management as policy reforms: A case study of the Dutch energy sector                  | Kern, F., Howlett, M.                                                                   | 2009 | Communication Patterns of Engineers, pp. 1-263                                                          | 228                        |
| 6   | Rural energy in developing countries: A challenge for economic development                                     | Barnes, D.F., Floor, W.M.                                                               | 1996 | Annual Review of Energy and the Environment, 21(1), pp. 497-530                                         | 208                        |
| 7   | Evaluation of a proposal for reliable low-cost grid power with 100% wind, water, and solar                     | Clack, C.T.M., Qvist, S.A., Apt, J., (...), Weyant, J.P., Whitacre, J.F.                | 2017 | Proceedings of the National Academy of Sciences of the United States of America, 114(26), pp. 6722-6727 | 178                        |
| 8   | Internet of things (IoT) and the energy sector                                                                 | Motlagh, N.H., Mohammadrezaei, M., Hunt, J., Zakeri, B.                                 | 2020 | Energies 13(2),494                                                                                      | 172                        |

|    |                                                                                                                |                                         |      |                                                         |     |
|----|----------------------------------------------------------------------------------------------------------------|-----------------------------------------|------|---------------------------------------------------------|-----|
| 9  | Full energy system transition towards 100% renewable energy in Germany in 2050                                 | Hansen, K., Mathiesen, B.V., Skov, I.R. | 2019 | Renewable and Sustainable Energy Reviews, 102, pp. 1-13 | 170 |
| 10 | The Local Sources of Market Formation: Explaining Regional Growth Differentials in German Photovoltaic Markets | Dewald, U., Truffer, B.                 | 2012 | European Planning Studies 20(3), pp. 397-420            | 141 |

Source: Authors' elaboration based on the Query 3 results.

The syntax of Query 6 is: TITLE-ABS-KEY ("energy sector")) AND (transformation AND transition AND strategy) AND (LIMIT-TO (SUBJAREA, "BUSI") OR LIMIT-TO (SUBJAREA, "DECI")) and this query yielded with gave 134 results. In Table S4 there are 10 most cited publications among results from Query 6.

**Table S4.** The 10 most cited publications result from Scopus Query no 6.

| No. | Document title                                                                                                          | Authors                                | Year | Source                                                                                | Citations<br>(20 Aug 2022) |
|-----|-------------------------------------------------------------------------------------------------------------------------|----------------------------------------|------|---------------------------------------------------------------------------------------|----------------------------|
| 1   | The impact of social norms on entrepreneurial action: Evidence from the environmental entrepreneurship context          | Meek, W.R., Pacheco, D.F., York, J.G.  | 2010 | Journal of Business Venturing 25(5), pp. 493-509                                      | 271                        |
| 2   | Making the energy transition in rural East Africa: Is leapfrogging an alternative?                                      | Murphy, J.T.                           | 2001 | Technological Forecasting and Social Change, 68(2), pp. 173-193                       | 116                        |
| 3   | Energy democracy: Germany's energiewende to renewables (Book)                                                           | Morris, C., Jungjohann, A.             | 2016 | Energy Democracy: Germany's Energiewende to Renewables pp. 1-437                      | 98                         |
| 4   | Technological learning in the energy sector: Lessons for policy, industry and science (Book)                            | Junginger, M., van Sark, W., Faaij, A. | 2010 | Technological Learning in the Energy Sector: Lessons for Policy, Industry and Science | 92                         |
| 5   | The three roles of business models in societal transitions: New linkages between business model and transition research | Bidmon, C.M., Knab, S.F.               | 2018 | Journal of Cleaner Production, 178, pp. 903-916                                       | 84                         |
| 6   | Blockchain and the future of energy                                                                                     | Brilliantova, V., Thurner, T.W.        | 2019 | Technology in Society, 57, pp. 38-45                                                  | 83                         |

|    |                                                                                                                              |                                    |      |                                                               |    |
|----|------------------------------------------------------------------------------------------------------------------------------|------------------------------------|------|---------------------------------------------------------------|----|
| 7  | Community energy and social entrepreneurship: Addressing purpose, organization and embeddedness of renewable energy projects | Becker, S., Kunze, C., Vancea, M.. | 2017 | Journal of Cleaner Production, 147, pp. 25-36                 | 82 |
| 8  | Creating the innovation ecosystem for renewable energy via social entrepreneurship: Insights from India                      | Surie, G..                         | 2017 | Technological Forecasting and Social Change, 121, pp. 184-195 | 76 |
| 9  | China, oil and global politics (Book)                                                                                        | Andrews-Speed, P., Dannreuther, R. | 2011 | China, Oil and Global Politics, pp. 1-233                     | 65 |
| 10 | Incumbents' diversification and cross-sectorial energy industry dynamics                                                     | Steen, M., Weaver, T.              | 2012 | Research Policy, 46(6), pp. 1071-1086                         | 59 |

Source: Authors' elaboration based on the Query 6 results.

The syntax of Query 9 is: (TITLE-ABS-KEY ("energy sector")) AND ("transformation strategy") and this query yielded with gave 23 results. In Table S4 there are 10 most cited publications among results from Query 9.

**Table S5.** The 10 most cited publications result from Scopus Query no 9.

| No. | Document title                                                                                                                  | Authors                 | Year | Source                                    | Citations<br>(20 Aug 2022) |
|-----|---------------------------------------------------------------------------------------------------------------------------------|-------------------------|------|-------------------------------------------|----------------------------|
| 1   | Digitization, Digital Twins, Blockchain, and Industry 4.0 as Elements of Management Process in Enterprises in the Energy Sector | Borowski, P.F.          | 2021 | Energies, 14(7),1885                      | 53                         |
| 2   | The Polish power industry in energy transformation process                                                                      | Gawlik, L.              | 2018 | Mineral Economics 31(1-2), pp. 229-237    | 31                         |
| 3   | Artificial intelligence in oil and gas upstream: Trends, challenges, and scenarios for the future                               | Koroteev, D., Tekic, Z. | 2021 | Energy and AI, 3,100041                   | 28                         |
| 4   | Transformation of energy balances with dominant coal consumption in European economies and Turkey in the years 1990-2017        | Jonek-Kowalska, I.      | 2019 | Oeconomia Copernicana, 10(4), pp. 627-647 | 26                         |



|    |                                                                                                               |                                                                          |      |                                                                                                         |    |
|----|---------------------------------------------------------------------------------------------------------------|--------------------------------------------------------------------------|------|---------------------------------------------------------------------------------------------------------|----|
| 5  | A top-down spatially resolved electrical load model                                                           | Robinius, M., Stein, F.T., Schwane, A., Stolten, D.                      | 2005 | Energies, 10(3),361                                                                                     | 17 |
| 6  | Artificial Intelligence and emerging digital technologies in the energy sector                                | Lyu, W., Liu, J.                                                         | 2021 | Applied Energy, 303,117615                                                                              | 15 |
| 7  | Australian economic models of greenhouse abatement                                                            | Diesendorf, M.                                                           | 1998 | Environmental Science and Policy 1(1), pp. 1-12                                                         | 11 |
| 8  | Carbon capture, storage and use: Technical, economic, environmental and societal perspectives (Book)          | Kuckshinrichs, W., Hake, J.-F.                                           | 2015 | Carbon Capture, Storage and Use: Technical, Economic, Environmental and Societal Perspectives pp. 1-347 | 10 |
| 9  | Coal phase out, energy efficiency, and electricity imports: Key elements to realize the energy transformation | Kost, C., Palzer, A., Sterchele, P., (...), Hartmann, N., Henning, H.-M. | 2019 | Applied Physics Reviews 6(1),011308                                                                     | 7  |
| 10 | Soft skills, hard skills: What matters most? Evidence from job postings                                       | Lyu, W., Liu, J.                                                         | 2021 | Applied Energy, 300,117307                                                                              | 4  |

Source: Authors' elaboration based on the Query 1 results.

The syntax of Query 10 is: (TITLE-ABS-KEY ("energy sector strategies")) and this query yielded with gave 15 results. In Table S4 there are 6 the most cited publications among results from Query 10. The rest of results citation number was equal 0, unbaling the construction of the 10-element ranking.

**Table S6.** The most cited 6 publications result from Scopus Query no 10.

| No. | Document title                                | Authors      | Year | Source                               | Citations<br>(20 Aug 2022) |
|-----|-----------------------------------------------|--------------|------|--------------------------------------|----------------------------|
| 1   | Renewable energy investment by the World Bank | Martinot, E. | 2001 | Applied Energy, 87(4), pp. 1059-1082 | 52                         |

|   |                                                                                                                           |                                                                      |      |                                              |    |
|---|---------------------------------------------------------------------------------------------------------------------------|----------------------------------------------------------------------|------|----------------------------------------------|----|
| 2 | Biofuel: Policy, standardization and recommendation for sustainable future energy supply                                  | Masjuki, H.H., Kalam, M.A., Mofijur, M., Shahabuddin, M.             | 2013 | Energy Procedia, 42, pp. 577-586             | 31 |
| 3 | Policies for a Sustainable Biomass Energy Sector in Malawi: Enhancing Energy and Food Security Simultaneously             | Schuenemann, F., Msangi, S., Zeller, M.                              | 2018 | World Development, 103, pp. 14-26            | 19 |
| 4 | Synthesis and nano-engineering of MXenes for energy conversion and storage applications: Recent advances and perspectives | Najam, T., Shah, S.S.A., Peng, L., (...), Zhao, M.-Q., Tsiakaras, P. | 2022 | Coordination Chemistry Reviews 454,214339    | 12 |
| 5 | Access to electricity for all and the role of decentralized solar power in sub-Saharan Africa.                            | Ulsrud, K                                                            | 2020 | Norsk Geografisk Tidsskrift 74(1), pp. 54-63 | 9  |
| 6 | Does location matter? Investigating the spatial and socio-economic drivers of residential energy use in Dar es Salaam     | Luo, C., Posen, I.D., MacLean, H.L.                                  | 2021 | Environmental Research Letters, 16(2),024041 | 2  |

Source: Authors' elaboration based on the Query 10 results.

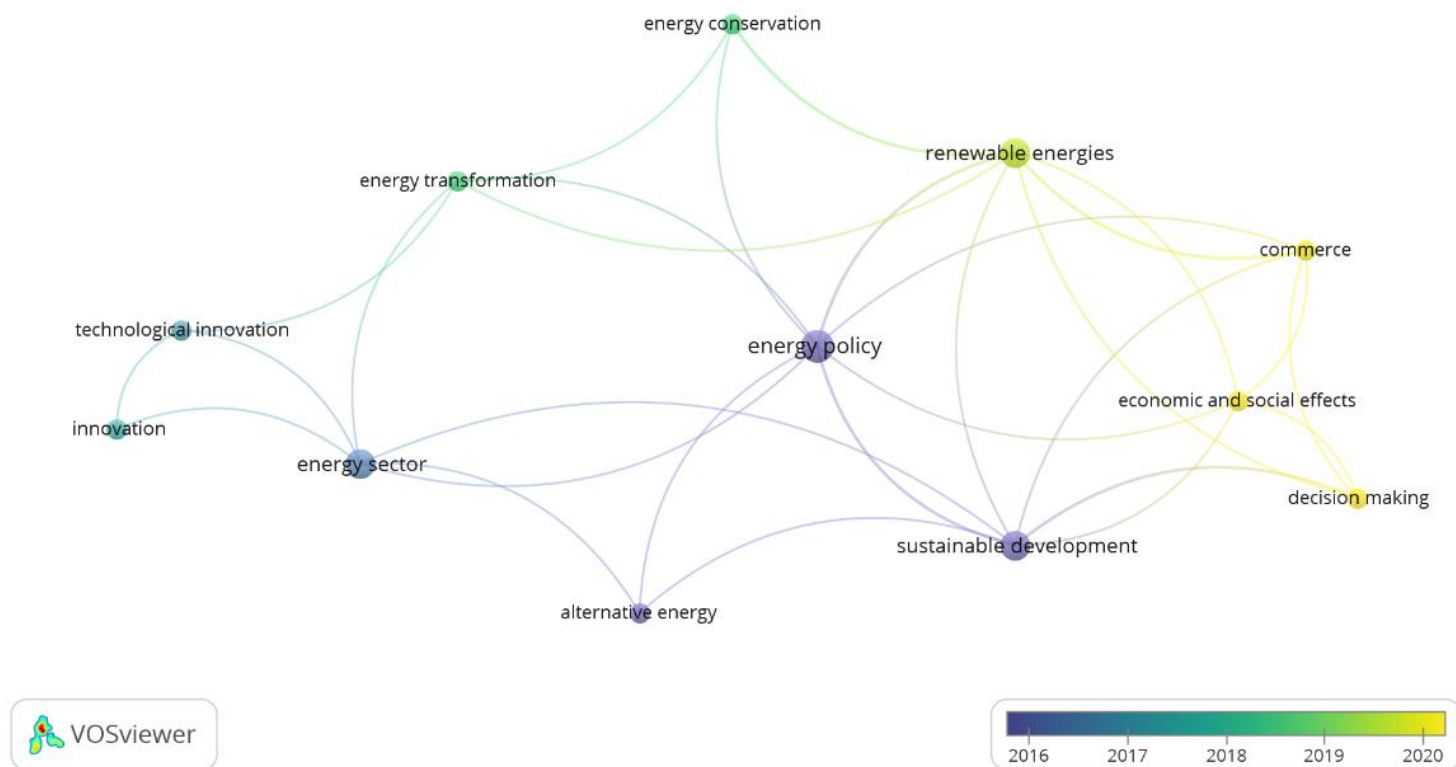

**Figure S2.** Bibliometric map overlay visualization of index keywords co-occurrence results from Scopus based on Query 18. Counting method: full counting. Minimum keywords co-occurrence is 10. Source: Authors' elaboration performed in VOSviewer (version 1.6.18).

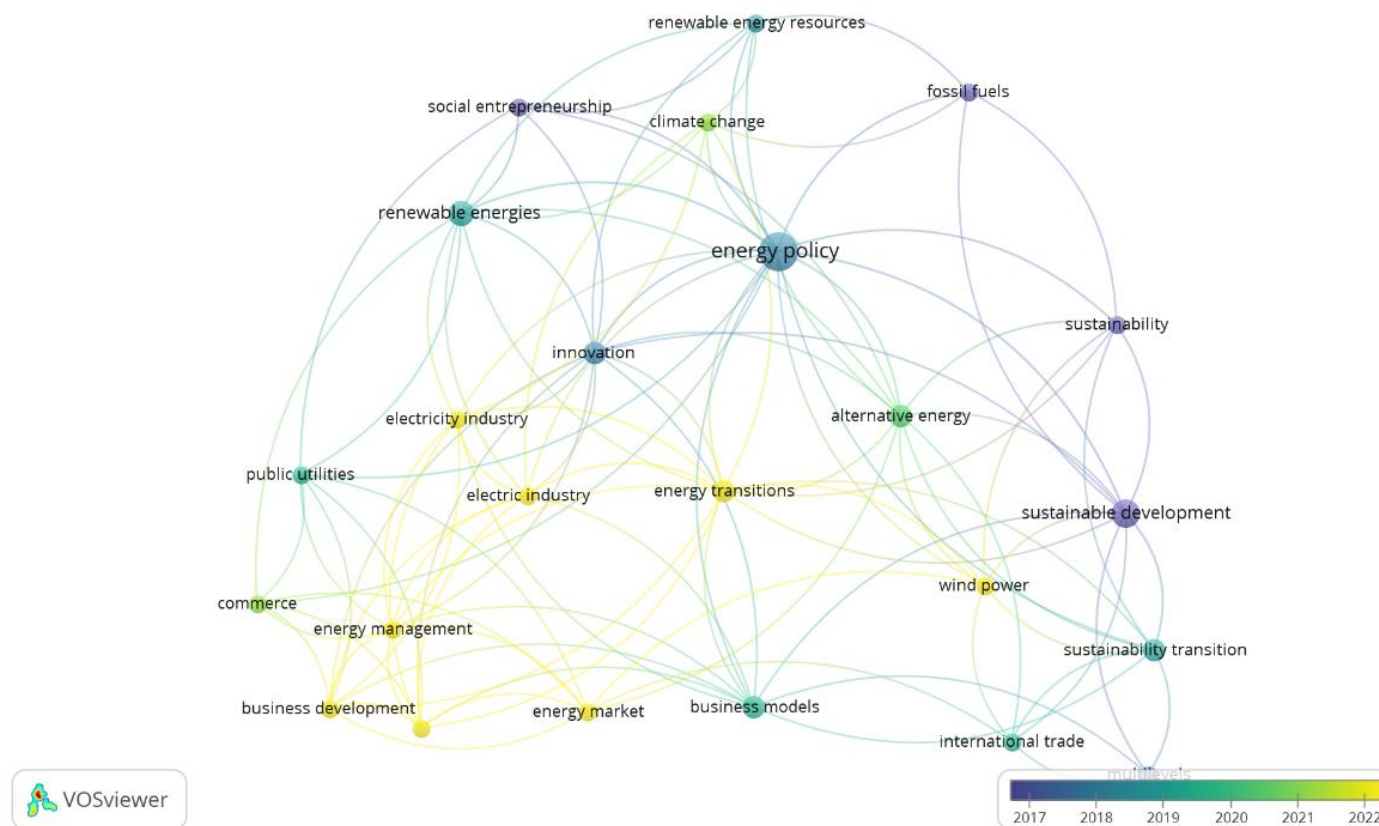

**Figure S3.** Bibliometric map overlay visualization of index keywords co-occurrence results from Scopus based on Query 19. Counting method: full counting. Minimum keywords co-occurrence is 2. Source: Authors' elaboration performed in VOSviewer (version 1.6.18).

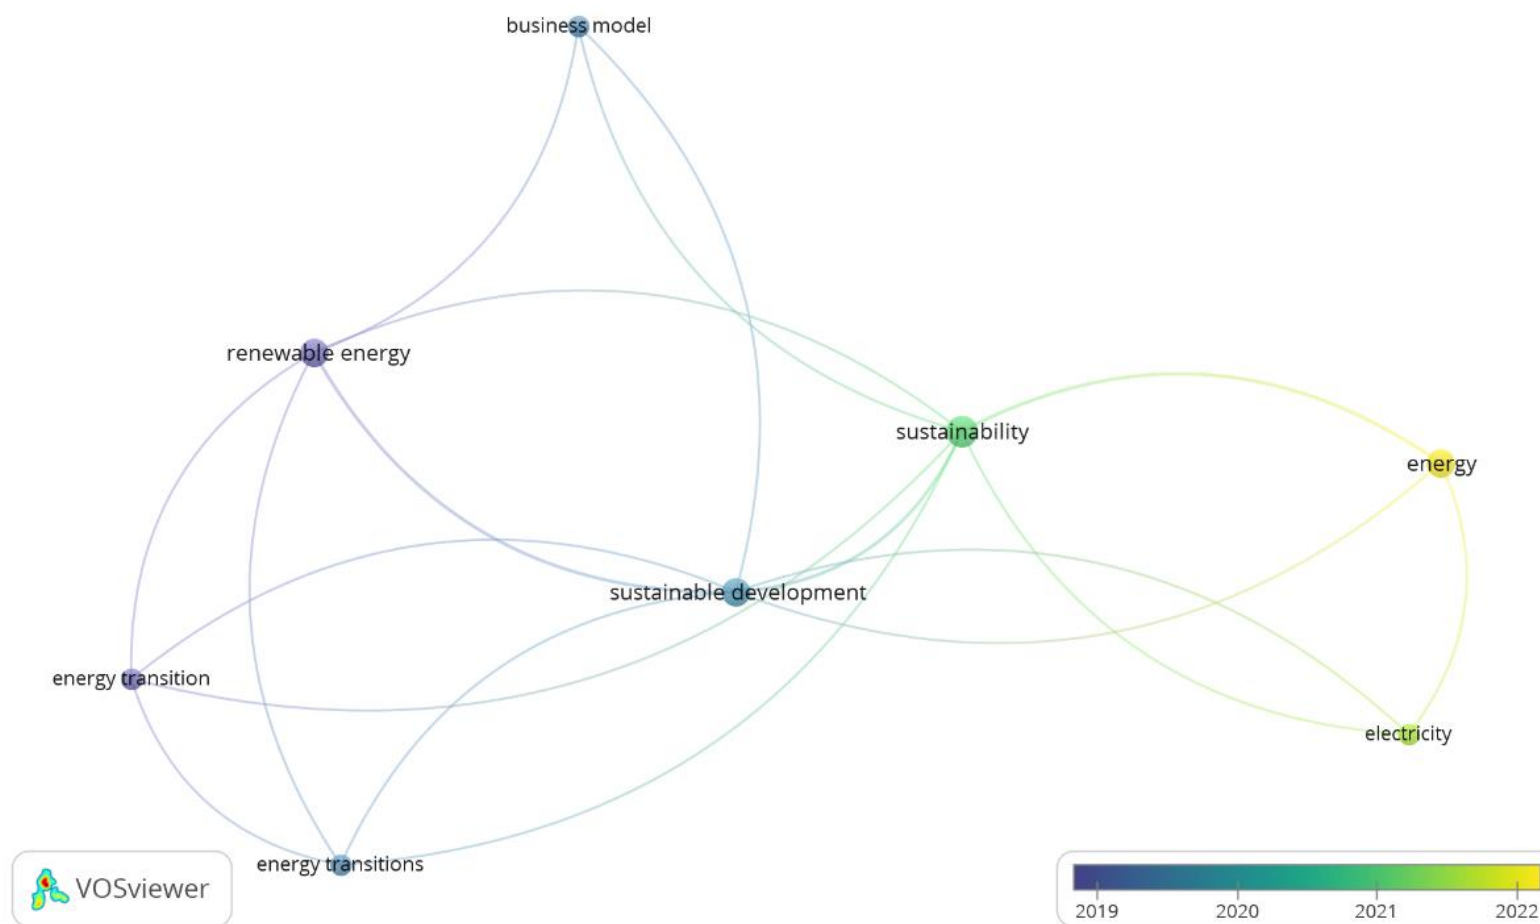

**Figure S4.** Bibliometric map overlay visualization of index keywords co-occurrence results from Scopus based on Query 20. Counting method: full counting. Minimum keywords co-occurrence is 10. Source: Authors' elaboration performed in VOSviewer (version 1.6.18).
